# Supplementary material
Source: PubMed Central journal article supplement (PMC6498453)
Supplement: supp_7.2.E283_2018-0116-original-submission.pdf [file supp_7.2.E283_2018-0116-original-submission.pdf]

**Is type of antenatal care provider, family physician, obstetrician or midwife, associated with excess or inadequate gestational weight gain? A retrospective cohort study.**

Beth Murray-Davis<sup>1</sup> (RM, PhD), Howard Berger<sup>2</sup> (MD), Nir Melamed<sup>3</sup> (MD), Haroon Hasan<sup>4</sup> (MPH), Karizma Mawjee<sup>2</sup> (MA), Maisah Syed<sup>1</sup> (MPH), Joel G. Ray<sup>5</sup> (MD), Michael Geary<sup>6</sup> (MD), Jon Barrett<sup>3</sup> (MD), and Sarah D. McDonald<sup>7</sup> (MD), for DOH-NET (Diabetes, Obesity and Hypertension in Pregnancy Research Network) and SOON (Southern Ontario Obstetrical Network) Investigators<sup>TM</sup>

<sup>1</sup> *Department of Obstetrics and Gynecology, Midwifery Education Program, McMaster University, Hamilton, Ontario, Canada*

<sup>2</sup> *Division of Maternal-Fetal Medicine, Department of Obstetrics and Gynecology, St. Michael's Hospital, University of Toronto, Ontario, Canada*

<sup>3</sup> *Division of Maternal-Fetal Medicine, Department of Obstetrics and Gynecology, Sunnybrook Health Sciences Centre, University of Toronto, Ontario, Canada*

<sup>4</sup> *Better Outcomes Registry & Network (BORN) Ontario, Children's Hospital of Eastern Ontario (CHEO), Ottawa, Ontario, Canada*

<sup>5</sup> *Departments of Medicine and Obstetrics and Gynaecology, St. Michael's Hospital, University of Toronto, Ontario, Canada<sup>3</sup>*

<sup>6</sup> *Department of Obstetrics & Gynaecology, Rotunda Hospital, Dublin, Ireland*

<sup>7</sup> *Division of Maternal-Fetal Medicine, Departments of Obstetrics and Gynecology, Radiology, and Research Methods, Evidence & Impact, McMaster University, Hamilton, Ontario, Canada*

**Correspondence author:**

Beth Murray-Davis RM, PhD [bmurray@mcmaster.ca](mailto:bmurray@mcmaster.ca)

**Conflict of Interest:** All authors report no conflict of interest.

**Funding source:**

This study was funded by Canadian Institute of Health Research (CIHR) (Grant#146442; Non-communicable Diseases in Obstetrics: Improving Quality of Care and Maternal-infant Outcomes Through an Obstetrical Research Network). Matched funding was provided by the Department of Obstetrics and Gynaecology at the University of Toronto, McMaster University, Sunnybrook Research Institute, and Providence St. Joseph's and St. Michael's Healthcare. Dr. Sarah D. McDonald is supported by a Tier II Canada Research Chair. Dr. Beth Murray-Davis is supported by a Hamilton Health Sciences Early Career

1  
2  
3  
4  
5  
6  
7  
8  
9  
10  
11  
12  
13  
14  
15  
16  
17  
18  
19  
20  
21  
22  
23  
24  
25  
26  
27  
28  
29  
30  
31  
32  
33  
34  
35  
36  
37  
38  
39  
40  
41  
42  
43  
44  
45  
46  
47  
48  
49  
50  
51  
52  
53  
54  
55  
56  
57  
58  
59  
60

35 Award. None of the funding agencies had any role in the idea, design, analyses, interpretation of data,  
36 writing of the manuscript or decision to submit the manuscript.

37  
38 Presentation: The current study was accepted for a poster presentation at the Canadian National Perinatal  
39 Research Meeting (Banff, AB, February 2018).

40  
41 ABSTRACT WORD COUNT: 250 words

42 TEXT WORD COUNT: 2447 words

Confidential

1  
2  
3 **43 ABSTRACT**  
4

5 44  
6 **45 Background**  
7

8 46 This study examined whether type of antenatal health care provider (HCP) (family physician, obstetrician,  
9 47 midwife, family physician + obstetrician) was associated with differing rates of excess or inadequate  
10 48 gestational weight gain (GWG) and associated adverse outcomes including large for gestational age  
11 49 (LGA), small for gestational age (SGA), cesarean section, preterm birth.  
12  
13

14 50  
15  
16 **51 Methods**  
17

18 52 This retrospective cohort study used data from the Better Outcomes Registry & Network, 2012-2016, for  
19 53 singleton hospital births at 20-42 weeks in Ontario, Canada. Descriptive statistics were calculated to  
20 54 summarize patient characteristics and outcomes by HCP. Crude and adjusted relative risks (RR) with 95%  
21 55 confidence intervals (CIs) were calculated for the exposure, GWG relative to each secondary outcome by  
22 56 HCP. Population attributable fractions (PAFs) with 95% CIs were calculated to assess the proportion of  
23 57 secondary outcomes that could be prevented if GWG not meeting the recommendation were removed by  
24 58 antenatal HCP.  
25  
26  
27  
28  
29

30 **60 Results**  
31

32 61 Rates of GWG below, within, or above recommendations were 13.7%, 31.0% and 55.3% respectively and  
33 62 did not differ across HCP groups. No difference was observed in rates of secondary outcomes according  
34 63 to GWG across HCPs. Excess GWG was associated with a significant risk for LGA and cesarean,  
35 64 inadequate GWG was associated with an increased risk of SGA and PTB. The PAFs indicated a  
36 65 pronounced contribution of excess GWG to LGA across all HCP groups.  
37  
38  
39  
40

41 **67 Interpretation**  
42

43 68 GWG and rates of secondary outcomes associated with GWG did not differ according to antenatal HCP.  
44 69 A significant proportion of LGA, SGA, cesarean could be prevented with appropriate GWG.  
45  
46  
47  
48  
49  
50  
51  
52  
53  
54  
55  
56  
57

## 74 Introduction

75 Gestational weight gain (GWG) during pregnancy below or above the recommended guidelines  
76 significantly increases maternal, fetal and neonatal risks (1–4). The 2009 Institute of Medicine (IOM)  
77 guidelines for GWG, adopted by Health Canada, recommend that underweight women (BMI < 18.5  
78 kg/m<sup>2</sup>) gain 13 to 18 kg during pregnancy, normal weight women (BMI 18.5 to 24.9 kg/m<sup>2</sup>) gain 11 to 16  
79 kg, overweight women (BMI 25 to 29.9 kg/m<sup>2</sup>) gain 7 to 11 kg, and obese women (BMI 30 kg/m<sup>2</sup> or  
80 more) gain only 5 to 9 kg (5). Excess GWG has been associated with an increased risk of gestational  
81 diabetes (1), gestational hypertension (4), augmentation of labour (3,4), cesarean section (3), birth trauma  
82 (3), neonatal macrosomia, and metabolic abnormalities (3,6), while inadequate GWG has been linked to  
83 fetal growth restriction, low birth weight and prematurity (2). Despite the robust literature in this area,  
84 GWG recommendations are often not met. Only 12% of Canadian women achieve the recommended  
85 GWG in pregnancy, and over half exceed the recommendations (6,7).

86 Cogswell et al (1999) found that women who received correct advice from their health care  
87 provider (HCP) about GWG were more likely to achieve appropriate GWG than women who received  
88 incorrect advice or no counseling (8). While the majority of HCPs reported counseling women on  
89 appropriate GWG, 30-40% of women reported that they did not receive counseling (7,9,10), and only  
90 about a quarter reported being informed about risks associated with inappropriate GWG (11). Yamamoto  
91 et al. (2014) found that women seen by obstetricians were significantly less likely to receive diet and  
92 exercise counseling than those seen by other types of HCPs (12). This may be because OB/GYN  
93 appointments typically last ten minutes, providing less of an opportunity to discuss GWG, compared to  
94 appointments with family physicians or midwives, which often last 15 and 30-45 minutes, respectively  
95 (13). Despite this evidence, the role of HCPs in GWG has not been fully explored.

96 The primary objective of this study was to examine whether type of antenatal HCP was  
97 associated with differing rates GWG. The secondary objective was to assess the association of GWG on  
98 adverse maternal and neonatal outcomes by antenatal HCP. We hypothesized that there would be  
99 differences in GWG by antenatal HCP due to variations in counselling approaches and patient populations  
100 of HCPs. We anticipated that midwifery clients would be more likely to achieve GWG within  
101 recommendations.

## 103 Methods

### 104 *Study Design*

105 We conducted a retrospective cohort study to compare the association of GWG by antenatal HCP and  
106 associated adverse maternal and neonatal outcomes for women who had a singleton hospital birth in  
107 Ontario, Canada between April 1, 2014 and March 31, 2016.

1  
2  
3 108 *Setting*

4 109 Ontario is the most populous province in Canada consisting of approximately 14 million people, which is  
5 110 roughly 40% of the entire Canadian population (14). Permanent residents of Ontario receive universal  
6 111 health coverage under the government-funded provincial health insurance plan (OHIP) and therefore have  
7 112 equal access to the option of receiving antenatal care from a HCP of their choice.  
8  
9  
10

11 113  
12  
13 114 *Study Population*

14 115 Women were identified using the Better Outcomes Registry & Network Information System (BIS)  
15 116 (<https://www.bornontario.ca/en/about-born/>), a province-wide registry of mothers and their newborns  
16 117 with 100% capture rate. Women included had a singleton hospital birth (live or stillbirth), a plausible  
17 118 body mass index (BMI) and GWG (i.e., 15-70 kg/m<sup>2</sup> and -10 kg to 50 kg, respectively) and gestational  
18 119 age at delivery between 20 to 42 weeks. The BIS contains comprehensive information on maternal and  
19 120 newborn care including data on “maternal demographics, health behaviours, reproductive history and  
20 121 clinical information related to pregnancy, labour, and birth, fetal, and neonatal outcomes” (15).  
21  
22  
23  
24  
25  
26

27 123 *Exposure and outcomes*

28 124 Antenatal HCP corresponded to the HCP that provided the majority of antenatal care and included family  
29 125 doctor (FD), obstetrician (OB), midwife (MW) and family doctor + obstetrician (FD + OB). The FD +  
30 126 OB group comprises of women initially seen by an FD and then transferred to an OB. Women with a  
31 127 HCP corresponding to “other”, “unknown” or nurse practitioner were removed from our cohort, as they  
32 128 comprised a small proportion of the population. In the event a woman had multiple antenatal HCPs, an  
33 129 algorithm (Supplementary Table 1), developed a priori, was applied.  
34  
35  
36  
37

38 130 GWG was defined as the difference in pre-pregnancy weight and final weight at delivery. The  
39 131 recommended weight gain in the 1<sup>st</sup> trimester is between 0.5 to 2 kg, while weight gain recommendations  
40 132 for gestations  $\leq 40$  weeks in the 2<sup>nd</sup> and 3<sup>rd</sup> trimester are specific to pre-pregnancy BMI categories defined  
41 133 by the World Health Organization Guidelines and include a recommended weekly weight gain  
42 134 (Supplementary Table 2). The weekly weight gain in the second and third trimesters was obtained by  
43 135 subtracting 2 kg (the upper limit for the first trimester) from the total weight gain and dividing by the  
44 136 number of weeks in the 2<sup>nd</sup> and 3<sup>rd</sup> trimesters (obtained by subtracting the 13 weeks of the first trimester  
45 137 from the total number of weeks of pregnancy). For pregnancies exceeding 40 weeks, the same upper limit  
46 138 of weekly recommended GWG for the 2<sup>nd</sup> and 3<sup>rd</sup> trimester up to 40 weeks was applied for beyond 40  
47 139 weeks.  
48  
49  
50  
51  
52

53 140 The primary exposure of interest was antenatal HCP and the primary outcome was  
54  
55  
56  
57

1  
2  
3 141 GWG below, within, or above the recommendations based on the IOM guidelines (5) after adjusting for  
4 142 gestational age as per above.

6 143 The secondary outcomes were small for gestational age (SGA) < 10<sup>th</sup> percentile and large for  
7 144 gestational age (LGA) > 90<sup>th</sup> percentile, preterm birth (PTB) (live birth or stillbirth with a gestational age  
8 145 at delivery < 37 weeks), caesarean section (CS). The exposure of interest was antenatal HCP, which was  
9 146 assessed by stratifying the association of GWG and the secondary outcomes by antenatal HCP. Published  
10 147 Canadian reference values were used to ascertain SGA and LGA (17).

14 148 Income and post-secondary completion quintiles were derived using postal code conversion plus  
15 149 (PCCF+) and the Canadian Census 2011, respectively, while remaining patient characteristic and  
16 150 outcome data were obtained from the BIS.

17 151

#### 20 152 *Missing Data*

22 153 The level of missing in the BIS during our time period for pre-pregnancy BMI and final weight at  
23 154 delivery was 14.0% and 11.0% respectively. We took two steps to overcome this limitation. First, we  
24 155 identified pregnancies which could be linked to the Prenatal Screening Ontario (PSO) database to  
25 156 ascertain first trimester weight. This database contains data for approximately 70% of pregnancies in  
26 157 Ontario (15). Of those that successfully linked and had first trimester weight, maternal height and missing  
27 158 pre-pregnancy weight, the IOM first trimester upper recommended weight gain of 2 kg was subtracted  
28 159 from first trimester weight to estimate pre-pregnancy weight and subsequently calculate pre-pregnancy  
29 160 BMI (5). This reduced the level of missing for pre-pregnancy BMI from 14.0% to 10.8%.

33 161 Second, the missing at random assumption was assessed and determined to be plausibly met by  
34 162 analyzing the frequency, pattern and reason for missing pre-pregnancy BMI. Multiple imputation was  
35 163 then performed to impute missing pre-pregnancy BMI and final weight at delivery using a chained  
36 164 equation approach on a subset of women with available pre-pregnancy weight (18). We created 11  
37 165 imputed datasets, as recommended by White et al. (2011), which were then combined across all datasets  
38 166 using Rubin's rule to obtain final model estimates (19). Following imputation, the level of missing was  
39 167 reduced from 10.8% to 4.6% and from 11.0% to 1.4% for pre-pregnancy BMI and final weight at  
40 168 delivery, respectively.

41 169

#### 42 170 *Analysis*

43 171 Descriptive statistics were calculated to summarize patient characteristics and outcomes by antenatal  
44 172 HCP. Absolute risk differences with 95% confidence intervals (CIs) were calculated to compare the  
45 173 proportion difference for GWG within, above, or below the recommendation by the primary exposure,

1  
2  
3 174 antenatal HCP for all possible combinations. An absolute risk difference with a standardized difference  $\geq$   
4 175 0.10 was assigned to indicate an importance difference (20–23).

6 176 Multivariable Poisson regression models with robust error variance were run to calculate crude  
7  
8 177 and adjusted relative risks (RR) with 95% CIs for the exposure GWG below or above recommendation  
9  
10 178 relative to within recommendation stratified by antenatal HCP on the following secondary outcomes by  
11  
12 179 antenatal HCP: SGA and LGA, PTB, and CS (24). Multivariable models to generate adjusted RRs were  
13  
14 180 adjusted for confounders specific to each secondary outcome and were chosen based on clinical expertise  
15  
16 181 and evidence in the literature (25–30). Confounders included in the multivariable models for SGA and  
17  
18 182 LGA were as follows: maternal age, parity, gestational age at birth, pre-pregnancy BMI, income quintile,  
19  
20 183 education quintile, smoking, depression, pre-existing diabetes, pre-existing hypertension and gestational  
21  
22 184 diabetes mellitus. Confounders included in the multivariable models for CS and PTB were as follows:  
23  
24 185 maternal age, parity, gestational age at birth, pre-pregnancy BMI, income quintile, education quintile,  
25  
26 186 smoking, pre-existing diabetes, pre-existing hypertension, gestational diabetes mellitus, drug exposure,  
27  
28 187 alcohol consumption, mental illness, previous: CS, term birth, PTB, vaginal birth, stillbirth, abortion;  
29  
30 188 non-vertex presentation and male newborn. Generalized estimating equations were used in the models to  
31  
32 189 account for multiple pregnancies for a woman within our cohort.

33  
34 190 Population attributable fractions (PAF) and 95% CIs, based on the adjusted RR, were calculated  
35  
36 191 to assess the proportion of the adverse outcome that could be potentially prevented if GWG not meeting  
37  
38 192 the recommendation were removed by antenatal HCP (31). Adjusted RRs and PAFs were visualized using  
39  
40 193 forest plots.

41  
42 194 All analyses were conducted in Statistical Analysis Software Version 9.4 (Cary, NC) and ethics  
43  
44 195 approval to conduct this study was obtained from the Hamilton Integrated Research Ethics Board.  
45  
46 196

## 47 197 **Results**

48  
49 198 Our final cohort consisted of 231,697 women of whom 26,043 (11.2%), 136,994 (59.1%), 32,262 (13.9%)  
50  
51 199 and 36,298 (15.7%) had an antenatal HCP corresponding to a FD, OB, MW and FD+OB respectively  
52  
53 200 (Table 1). Maternal characteristics by antenatal HCP are summarized in Table 1.

54  
55 201 Overall, the percentages of total GWG below, within, or above recommendations were 13.7%,  
56  
57 202 31.0% and 55.3%, respectively (Figure 2). There were no significant differences in the absolute risk  
58  
59 203 differences for women gaining below, within or above GWG recommendations, stratified by antenatal  
60  
204 HCP, with the exception of excess GWG between OB vs. shared care between OB and FD (Table 2 and  
205 Supplementary Table 3). The absolute risk difference for OB vs. shared care between OB and FD for  
206 excess GWG was -5.1% (95% CI -5.7% to 4.5%). A trend toward those in midwifery care being less



likely to gain below recommended levels than those cared for by an obstetrician was observed (Absolute risk difference -3.0%, 95% CI -3.4% to -2.6%; Absolute Difference -0.09, 95% CI -0.10 to -0.08)

The risks of adverse secondary outcomes were similar between women who gained below or above the recommended amounts, stratified by antenatal HCPs (Figures 3 and 4). Inadequate GWG was associated with a higher risk for SGA (aRR 1.37; 95% CI 1.32-1.42) and PTB (aRR 1.34; 95% CI 1.27-1.41), but was protective for LGA (aRR 0.79; 95% CI 0.75-0.83) and was not associated with an increased risk for CS (aRR 0.98; 95% CI 0.96-1.00). Excess GWG was protective for SGA (aRR 0.63; 95% CI 0.61-0.64) and was associated with a higher risk for LGA (aRR 1.88; 95% CI 1.82-1.94) as well as CS (aRR 1.10 95% CI 1.08-1.11). Excess GWG was not associated with an increased risk of PTB (aRR 1.00; 95% CI 0.96-1.04).

No differences were observed in PAFs for all outcomes between antenatal HCP when women had adequate or inadequate GWG (Figure 5 & 6). Excess GWG was associated with a negative PAF (-23.6%, 95% CI -28.4 to 18.9%) for SGA, but was associated with a PAF of nearly 35% for LGA (PAF 34.3%, 95% CI 32.7 to 35.8%). The PAFs for excess GWG were not significant for PTB although they were for CS (PAF 5.5%, 95% CI 4.1 to 6.8%). Inadequate GWG was associated with a slightly positive PAF for SGA (PAF 6.0%, 95% CI 5.1 to 7.0%) as well as PTB (PAF 4.7%, 95% CI 3.5% to 5.8%) and a slightly protective PAF for LGA (PAF -2.0%, 95% CI -3.2 to 0.8%). The PAFs for inadequate GWG were not significant for CS.

## Discussion

To our knowledge, this is the first study examining GWG in pregnancy by type of antenatal HCP and we did not find a clinically significant association with excess or inadequate GWG by provider type, despite our hypothesis that different counseling techniques and approaches to care would result in differing GWG. A similar proportion of women gained below, within and above the recommendations across all antenatal HCP groups. Of note, over half of all women, regardless of antenatal HCP, had excessive GWG.

Standardized differences between the HCPs highlighted two findings. First, women in midwifery care may be slightly less likely to gain below recommended levels than those cared for by an obstetrician. Second, women in the FP + OB group were more likely to have excess GWG compared to women in the other provider groups. It is possible that the lack of continuous care provider may impact counselling about nutrition and exercise during pregnancy. Consistent and on-going counselling on these topics may play a role in raising awareness about appropriate GWG. We found no difference in the rates of the secondary outcomes according to GWG across HCP groups. This is an important finding given that women in Ontario can choose which HCP they see for their pregnancy, and the great variation in access to care and care providers throughout the province.



1  
2  
3 241 Our research adds to the growing evidence exploring the magnitude of the association of excess  
4 242 GWG being a significant risk for LGA and CS, while gaining below increases the risk of SGA and PTB  
5 243 (26,32–35). Excess GWG contributes importantly to LGA (PAF 35%), as has been previously reported  
6 244 (34–38) and this was similar across all HCP groups. This finding demonstrates the critical need for  
7 245 promoting appropriate GWG to prevent a modifiable risk factor for maternal and neonatal morbidity.

8 246 Our study has several strengths including being the first to examine GWG according to care  
9 247 provider, and having a large sample size which enabled adjustment for a number of potential confounders.  
10 248 Our study has several limitations. Due to its retrospective nature, information on several potential  
11 249 confounding variables, such as history of previous LGA or SGA infant, was unavailable. Finally, we  
12 250 lacked data on per trimester weight gain, which could be a key factor for understanding potential time  
13 251 points for intervention.

14 252

## 15 253 **Conclusion**

16 254 Our study is the first to show that regardless of antenatal HCP, GWG did not differ. This suggests a  
17 255 similar need for improvement in counseling to support appropriate GWG across all types of care  
18 256 providers. Also, the rates of adverse outcomes associated with gaining above, below or within  
19 257 recommendations did not differ according to HCP. Among pregnant women in Ontario, a significant  
20 258 proportion of LGA, SGA and CS could potentially be prevented with appropriate GWG. Further research  
21 259 exploring counseling techniques and strategies for promoting optimal GWG would be beneficial.

22 260

23 261

24 262

25 263

26 264

27 265

28

29

30

31

32

33

34

35

36

37

38

39

40

1  
2  
3  
4  
5  
6  
7  
8  
9  
10  
11  
12  
13  
14  
15  
16  
17  
18  
19  
20  
21  
22  
23  
24  
25  
26  
27  
28  
29  
30  
31  
32  
33  
34  
35  
36  
37  
38  
39  
40  
41  
42  
43  
44  
45  
46  
47  
48  
49  
50  
51  
52  
53  
54  
55  
56  
57  
58  
59  
60266 **References:**

- 267
- 268 1. Cedergren M. Effects of gestational weight gain and body mass index on obstetric outcome in  
269 Sweden. *Int J Gynaecol Obstet.* 2006;93:269–74.
- 270 2. Han Z, Lutsiv O, Mulla S, Rosen A, Beyene J, McDonald SD. Low gestational weight gain and  
271 the risk of preterm birth and low birthweight: A systematic review and meta-analyses. *Acta*  
272 *Obstetrica et Gynecologica Scandinavica.* 2011;90(9): 935–54.
- 273 3. Stotland NE, Hopkins LM, Caughey AB. Gestational weight gain, macrosomia, and risk of  
274 cesarean birth in nondiabetic nulliparas. *Obstet Gynecol.* 2004;104(4):671–7.
- 275 4. Thorsdottir I, Torfadottir JE, Birgisdottir BE, Geirsson RT. Weight gain in women of normal  
276 weight before pregnancy: Complications in pregnancy or delivery and birth outcome. *Obstetrics*  
277 *and Gynecology.* 2002; May (99). p. 799–806.
- 278 5. Rasmussen KM, Yaktine AL. *Weight gain during pregnancy: Reexamining the guidelines.*  
279 National Academies Press. 2009.
- 280 6. Crane JMG, White J, Murphy P, Burrage L, Hutchens D. The effect of gestational weight gain by  
281 body mass index on maternal and neonatal outcomes. *J Obstet Gynaecol Can [Internet].*  
282 2009;31(1):28–35.
- 283 7. McDonald SD, Pullenayegum E, Taylor VH, Lutsiv O, Bracken K, Good C, Hutton E, Sword W.  
284 Despite 2009 guidelines, few women report being counseled correctly about weight gain during  
285 pregnancy. *Am J Obstet Gynecol [Internet].* 2011;205(4):333.
- 286 8. Cogswell ME, Scanlon KS, Fein SB, Schieve LA. Medically advised, mother’s personal target,  
287 and actual weight gain during pregnancy. *Obstet Gynecol.* 1999;94(4):616–22.
- 288 9. Ferrari RM, Siega-Riz AM, Evenson KR, Moos MK, Carrier KS. A qualitative study of women’s  
289 perceptions of provider advice about diet and physical activity during pregnancy. *Patient Educ*  
290 *Couns.* 2013;91(3):372–7.
- 291 10. Phelan S, Phipps MG, Abrams B, Darroch F, Schaffner A, Wing RR. Practitioner Advice and  
292 Gestational Weight Gain. *J Women’s Health.* 2011;20(4):585–91.
- 293 11. Lutsiv O, Bracken K, Pullenayegum E, Sword W, Taylor VH, McDonald SD. Little Congruence  
294 Between Health Care Provider and Patient Perceptions of Counselling on Gestational Weight  
295 Gain. *J Obstet Gynaecol Canada.* 2012;34(6):518–24.
- 296 12. Yamamoto A, McCormick MC, Burris HH. US provider-reported diet and physical activity  
297 counseling to pregnant and non-pregnant women of childbearing age during preventive care visits.  
298 *Matern Child Health J.* 2014;18(7):1610–8.
- 299 13. McDonald SD, Pullenayegum E, Bracken K, Chen AM, McDonald H, Malott A, et al. Comparison  
300 of Midwifery, Family Medicine, and Obstetric Patients’ Understanding of Weight Gain During  
301 Pregnancy: A Minority of Women Report Correct Counselling. *J Obstet Gynaecol Canada.*  
302 2012;34(2):129–35.
- 303 14. Statistics Canada. Table 051-0001: Estimates of population, by age group and sex for July 1,  
304 Canada, provinces and territories, annual (persons unless otherwise noted) [Internet]. *International*  
305 *Journal of Human-Computer Studies.* 2011. p. 508–24. Available from:  
306 <http://www5.statcan.gc.ca/cansim/a26>
- 307 15. Better Outcomes Registry & Network (BORN) Ontario Annual Report 2012–2013 and 2013–  
308 2014. Ottawa, Ontario; 2015.
- 309 16. WHO. Global Database on Body Mass Index an interactive surveillance tool for monitoring  
310 nutrition transition. 2017.
- 311 17. Kramer MS, Platt RW, Wen SW, Joseph KS, Allen A, Abrahamowicz M, et al. A New and  
312 Improved Population-Based Canadian Reference for Birth Weight for Gestational Age. *Pediatrics.*  
313 2001;108(2):e35–e35.
- 314 18. Azur MJ, Stuart EA, Frangakis C, Leaf PJ. Multiple imputation by chained equations: What is it  
315 and how does it work? *Int J Methods Psychiatr Res.* 2011;20(1):40–9.
- 316 19. Wang C, Wei Y, Zhang X, Zhang Y, Xu Q, Sun Y, et al. A randomized clinical trial of exercise

10

- 1  
2  
3 317 during pregnancy to prevent gestational diabetes mellitus and improve pregnancy outcome in  
4 318 overweight and obese pregnant women. *Am J Obstet Gynecol.* 2017;216(4):340–51.
- 5 319 20. Yang D, Dalton J. A unified approach to measuring the effect size between two groups using  
6 320 SAS®. *SAS Glob Forum.* 2012;6. Available from:  
7 321 <http://support.sas.com/resources/papers/proceedings12/335-2012.pdf>
- 8 322 21. Hedges L V., Olkin I. Statistical methods for meta-analysis. *Phytochemistry.* 1985;72(13):369.
- 9 323 22. Cohen J. Statistical power analysis for the behavioral sciences. *Statistical Power Analysis for the*  
10 324 *Behavioral Sciences.* 1988. p. 567.
- 11 325 23. Mamdani M, Sykora K, Li P, Normand S-LT, Streiner DL, Austin PC, et al. Reader's guide to  
12 326 critical appraisal of cohort studies: 2. Assessing potential for confounding. *BMJ.*  
13 327 2005;330(7497):960–2.
- 14 328 24. Zou G. A Modified Poisson Regression Approach to Prospective Studies with Binary Data. *Am J*  
15 329 *Epidemiol.* 2004;159(7):702–6.
- 16 330 25. Ehrenberg HM, Mercer BM, Catalano PM. The influence of obesity and diabetes on the  
17 331 prevalence of macrosomia. *American Journal of Obstetrics and Gynecology.* 2004. p. 964–8.
- 18 332 26. Hellerstedt WL, Himes JH, Story M, Alton IR, Edwards LE. The effects of cigarette smoking and  
19 333 gestational weight change on birth outcomes in obese and normal-weight women. *Am J Public*  
20 334 *Health.* 1997;87(4):591–6.
- 21 335 27. Kramer MS. Determinants of low birth weight: methodological assessment and meta-analysis.  
22 336 *Bull World Health Organ.* 1987;65(5):663–737.
- 23 337 28. Joseph KS, Kramer MS, Marcoux S, Ohlsson A, Wen SW, Allen A, et al. Determinants of Preterm  
24 338 Birth Rates in Canada from 1981 through 1983 and from 1992 through 1994. *N Engl J Med.*  
25 339 1998;339(20):1434–9.
- 26 340 29. Joseph KS, Young DC, Dodds L, O'Connell CM, Allen VM, Chandra S, et al. Changes in  
27 341 maternal characteristics and obstetric practice and recent increases in primary cesarean delivery.  
28 342 *Obstet Gynecol.* 2003;102(4):791–800.
- 29 343 30. Dougherty CR, Jones AD. Th determinants of birth weight. *Am J Obstet Gynecol.*  
30 344 1982;144(2):190–200.
- 31 345 31. Daly LE. Confidence limits made easy: Interval estimation using a substitution method. *Am J*  
32 346 *Epidemiol.* 1998;147(8):783–90.
- 33 347 32. Caulfield LE, Stoltzfus RJ, Witter FR. Implications of the Institute of Medicine weight gain  
34 348 recommendations for preventing adverse pregnancy outcomes in Black and White women. *Am J*  
35 349 *Public Health.* 1998;88(8):1168–74.
- 36 350 33. Margerison Zilko CE, Rehkopf D, Abrams B. Association of maternal gestational weight gain  
37 351 with short- and long-term maternal and child health outcomes. *Am J Obstet Gynecol.* 2010;202(6).
- 38 352 34. Dzakpasu S, Fahey J, Kirby RS, Tough SC, Chalmers B, Heaman MI, et al. Contribution of  
39 353 prepregnancy body mass index and gestational weight gain to adverse neonatal outcomes:  
40 354 Population attributable fractions for Canada. *BMC Pregnancy Childbirth.* 2015;15(1).
- 41 355 35. Dzakpasu S, Fahey J, Kirby RS, Tough SC, Chalmers B, Heaman MI, et al. Contribution of  
42 356 prepregnancy body mass index and gestational weight gain to caesarean birth in Canada. *BMC*  
43 357 *Pregnancy Childbirth.* 2014;14(1).
- 44 358 36. Oteng-Ntim E, Kopeika J, Seed P, Wandiembe S, Doyle P. Impact of Obesity on Pregnancy  
45 359 Outcome in Different Ethnic Groups: Calculating Population Attributable Fractions. *PLoS One.*  
46 360 2013;8(1).
- 47 361 37. Djelantik AA, Kunst AE, Van Der Wal MF, Smit HA, Vrijkotte TGM. Contribution of overweight  
48 362 and obesity to the occurrence of adverse pregnancy outcomes in a multi-ethnic cohort: Population  
49 363 attributive fractions for Amsterdam. *BJOG.* 2012;119(3):283–90.
- 50 364 38. Lu GC, Rouse DJ, DuBard M, Cliver S, Kimberlin D, Hauth JC. The effect of the increasing  
51 365 prevalence of maternal obesity on perinatal morbidity. *Am J Obstet Gynecol.* 2001;185(4):845–9.  
52 366

1  
2  
3  
4  
5  
6  
7  
8  
9  
10  
11  
12  
13  
14  
15  
16  
17  
18  
19  
20  
21  
22  
23  
24  
25  
26  
27  
28  
29  
30  
31  
32  
33  
34  
35  
36  
37  
38  
39  
40  
41  
42  
43  
44  
45  
46  
47

**TABLE 1: Maternal characteristics by antenatal health care provider**

| Characteristic                                                 | Antenatal Health Care Provider |                          |                           |                          |                               |
|----------------------------------------------------------------|--------------------------------|--------------------------|---------------------------|--------------------------|-------------------------------|
|                                                                | All (N = 231,697)<br>N (%)     | FD (N = 26,043)<br>N (%) | OB (N = 136,994)<br>N (%) | MW (N = 32,362)<br>N (%) | FD + OB (N = 36,298)<br>N (%) |
| <b>Maternal Age (y), n (%)</b>                                 |                                |                          |                           |                          |                               |
| ≤ 24                                                           | 30,896 (13.3%)                 | 5,014 (19.3%)            | 16,215 (11.8%)            | 3,663 (11.3%)            | 6,004 (16.5%)                 |
| 25-29                                                          | 64,476 (27.8%)                 | 8,140 (31.3%)            | 35,950 (26.2%)            | 9,487 (29.3%)            | 10,899 (30%)                  |
| 30-34                                                          | 84,644 (36.5%)                 | 8,713 (33.5%)            | 50,335 (36.7%)            | 12,995 (40.2%)           | 12,601 (34.7%)                |
| ≥ 35                                                           | 51,681 (22.3%)                 | 4,176 (16.0%)            | 34,494 (25.2%)            | 6,217 (19.2%)            | 6,794 (18.7%)                 |
| <b>Pre-pregnancy BMI (kg/m<sup>2</sup>)<sup>1</sup>, n (%)</b> |                                |                          |                           |                          |                               |
| <i>Underweight: BMI &lt; 18.5</i>                              | 14,018 (6.1%)                  | 1,440 (5.5%)             | 9,086 (6.6%)              | 1,608 (5%)               | 1,884 (5.2%)                  |
| <i>Normal weight: 18.5 ≤ BMI &lt; 25</i>                       | 120,434 (52%)                  | 13,337 (51.2%)           | 70,883 (51.7%)            | 18,401 (56.9%)           | 17,813 (49.1%)                |
| <i>Overweight : 25 ≤ BMI &lt; 30</i>                           | 55,712 (24.0%)                 | 6,485 (24.9%)            | 32,820 (24.0%)            | 7,551 (23.3%)            | 8,856 (24.4%)                 |
| <i>Obese: BMI ≥ 30</i>                                         | 41,533 (17.9%)                 | 4,781 (18.4%)            | 24,205 (17.7%)            | 4,802 (14.8%)            | 7,745 (21.3%)                 |
| <b>Gestational Weight Gain (kg)<sup>2</sup>, n (%)</b>         |                                |                          |                           |                          |                               |
| <i>GWG &lt; recommended</i>                                    | 31,804 (13.7%)                 | 3,567 (13.7%)            | 19,936 (14.6%)            | 3,742 (11.6%)            | 4,559 (12.6%)                 |
| <i>GWG = recommended</i>                                       | 71,777 (31.0%)                 | 7,768 (29.8%)            | 43,270 (31.6%)            | 10,405 (32.2%)           | 10,334 (28.5%)                |
| <i>GWG &gt; recommended</i>                                    | 128,116 (55.3%)                | 14,708 (56.5%)           | 73,788 (53.9%)            | 18,215 (56.3%)           | 21,405 (59%)                  |
| <b>Pre-existing diabetes, n (%)</b>                            | 2,149 (0.9%)                   | 115 (0.4%)               | 1,544 (1.1%)              | 83 (0.3%)                | 407 (1.1%)                    |
| <b>Pre-existing hypertension, n (%)</b>                        | 1,875 (0.8%)                   | 146 (0.6%)               | 1,293 (0.9%)              | 92 (0.3%)                | 344 (0.9%)                    |
| <b>Gestational Diabetes Mellitus, n (%)</b>                    | 14,849 (6.4%)                  | 1,143 (4.4%)             | 10,245 (7.5%)             | 1,270 (3.9%)             | 2,191 (6.0%)                  |
| <b>Nulliparous, n (%)</b>                                      | 100,347 (43.3%)                | 11,536 (44.3%)           | 57,781 (42.2%)            | 15,359 (47.5%)           | 15,671 (43.2%)                |
| <b>Gravidity, n (%)</b>                                        |                                |                          |                           |                          |                               |
| <i>Primigravid</i>                                             | 74,634 (32.2%)                 | 8,706 (33.4%)            | 42,540 (31.1%)            | 11,708 (36.2%)           | 11,680 (32.2%)                |
| <i>Multigravid</i>                                             | 155,619 (67.2%)                | 17,165 (65.9%)           | 93,187 (68%)              | 20,652 (63.8%)           | 24,615 (67.8%)                |
| <b>Income quintile<sup>3</sup>, n (%)</b>                      |                                |                          |                           |                          |                               |
| 1 "lowest"                                                     | 48,414 (20.9%)                 | 5,769 (22.2%)            | 30,324 (22.1%)            | 5,560 (17.2%)            | 6,761 (18.6%)                 |
| 2                                                              | 46,243 (20.0%)                 | 5,041 (19.4%)            | 28,116 (20.5%)            | 6,199 (19.2%)            | 6,887 (19.0%)                 |
| 3                                                              | 46,908 (20.2%)                 | 5,255 (20.2%)            | 27,270 (19.9%)            | 6,594 (20.4%)            | 7,789 (21.5%)                 |
| 4                                                              | 48,916 (21.1%)                 | 5,227 (20.1%)            | 28,128 (20.5%)            | 7,402 (22.9%)            | 8,159 (22.5%)                 |
| 5 "highest"                                                    | 37,207 (16.1%)                 | 4,339 (16.7%)            | 20,683 (15.1%)            | 6,063 (18.7%)            | 6,122 (16.9%)                 |
| <b>Education quintile<sup>4</sup>, n (%)</b>                   |                                |                          |                           |                          |                               |
| 1 "lowest"                                                     | 45,156 (19.5%)                 | 6,479 (24.9%)            | 21,450 (15.7%)            | 6,808 (21%)              | 10,419 (28.7%)                |
| 2                                                              | 45,027 (19.4%)                 | 5,675 (21.8%)            | 23,799 (17.4%)            | 6,651 (20.6%)            | 8,902 (24.5%)                 |
| 3                                                              | 44,908 (19.4%)                 | 4,794 (18.4%)            | 27,549 (20.1%)            | 6,093 (18.8%)            | 6,472 (17.8%)                 |

|                                                    |                 |                |                |                |                |
|----------------------------------------------------|-----------------|----------------|----------------|----------------|----------------|
| 4                                                  | 44,646 (19.3%)  | 3,756 (14.4%)  | 29,796 (21.7%) | 5,857 (18.1%)  | 5,237 (14.4%)  |
| 5 "highest"                                        | 44,294 (19.1%)  | 3,671 (14.1%)  | 30,088 (22.0%) | 6,273 (19.4%)  | 4,262 (11.7%)  |
| Missing                                            | 7,666 (3.3%)    | 1,668 (6.4%)   | 4,312 (3.1%)   | 680 (2.1%)     | 1,006 (2.8%)   |
| <b>Mental illness, n (%)</b>                       | 35,271 (15.2%)  | 4,832 (18.6%)  | 16,291 (11.9%) | 6,867 (21.2%)  | 7,281 (20.1%)  |
| <b>Depression, n (%)</b>                           | 17,196 (7.4%)   | 2,502 (9.6%)   | 7,591 (5.5%)   | 3,246 (10.0%)  | 3,857 (10.6%)  |
| <b>Alcohol consumption during pregnancy, n (%)</b> | 5,665 (2.4%)    | 899 (3.5%)     | 2,772 (2%)     | 846 (2.6%)     | 1,148 (3.2%)   |
| <b>Smoking during pregnancy, n (%)</b>             |                 |                |                |                |                |
| Yes                                                | 23,342 (10.1%)  | 4,063 (15.6%)  | 12,065 (8.8%)  | 1,880 (5.8%)   | 5,334 (14.7%)  |
| Missing                                            | 9,079 (3.9%)    | 979 (3.8%)     | 7,668 (5.6%)   | 202 (0.6%)     | 230 (0.6%)     |
| <b>Drug exposure during pregnancy, n (%)</b>       | 4,542 (2.0%)    | 954 (3.7%)     | 2,202 (1.6%)   | 407 (1.3%)     | 979 (2.7%)     |
| <b>Prenatal Classes, n (%)</b>                     |                 |                |                |                |                |
| Yes                                                | 51,293 (22.1%)  | 6,127 (23.5%)  | 26,951 (19.7%) | 10,120 (31.3%) | 8,095 (22.3%)  |
| Missing                                            | 16,810 (7.3%)   | 1,943 (7.5%)   | 10,928 (8.0%)  | 2,460 (7.6%)   | 1,479 (4.1%)   |
| <b>Previous preterm birth, n (%)</b>               | 12,256 (5.3%)   | 1,034 (4.0%)   | 8,075 (5.9%)   | 1,305 (4.0%)   | 1,842 (5.1%)   |
| <b>Previous caesarean birth, n (%)</b>             | 34,652 (15.0%)  | 2,283 (8.8%)   | 23,543 (17.2%) | 2,842 (8.8%)   | 5,984 (16.5%)  |
| <b>Previous abortion (A), n (%)</b>                | 75,100 (32.4%)  | 8,134 (31.2%)  | 45,102 (32.9%) | 9,947 (30.7%)  | 11,917 (32.8%) |
| <b>Previous term birth, n (%)</b>                  | 124,036 (53.5%) | 13,905 (53.4%) | 74,108 (54.1%) | 16,352 (50.5%) | 19,671 (54.2%) |
| <b>Previous vaginal birth, n (%)</b>               | 96,788 (41.8%)  | 12,132 (46.6%) | 55,108 (40.2%) | 14,366 (44.4%) | 15,182 (41.8%) |
| <b>Previous stillbirth, n (%)</b>                  | 3,097 (1.3%)    | 226 (0.9%)     | 2,241 (1.6%)   | 280 (0.9%)     | 350 (1.0%)     |
| <b>Non-vertex presentation, n (%)</b>              | 9,190 (4.0%)    | 707 (2.7%)     | 5,536 (4.0%)   | 1,270 (3.9%)   | 1,677 (4.6%)   |
| Missing                                            | 16,179 (7.0%)   | 1,655 (6.4%)   | 13,189 (9.6%)  | 328 (1.0%)     | 1,007 (2.8%)   |
| <b>Male newborn, n (%)</b>                         | 118,794 (51.3%) | 13,331 (51.2%) | 70,254 (51.3%) | 16,713 (51.6%) | 18,496 (51.0%) |

**Data Sources:** BORN Ontario (2014-2016)

**Cohort definition:** Women who had a singleton birth of whom had plausible BMI and GWG available.

**Abbreviations:** FD, Family Doctor; OB, Obstetrician; MW, Midwife; HCP, Healthcare Provider

\* refers to p-value <0.05 and based on the chi-square test

**Notes:**

<sup>1</sup> Pre-pregnancy BMI categories reflect WHO classification

<sup>2</sup> Total gestational weight gain recommended for singleton pregnancies based on a woman's pre-pregnancy BMI (adapted from: IOM, 2009)

<sup>3</sup> Income quintiles are derived from Postal Code Conversion File Plus + 2013 and are based on postal code

<sup>4</sup> Education quintiles reflect post-secondary completion and are derived from the Census 2011 using postal code

Missing reported for characteristics with a percentage of missing greater than 2%

1  
2  
3  
4  
5  
6  
7  
8  
9  
10  
11  
12  
13  
14  
15  
16  
17  
18  
19  
20  
21  
22  
23  
24  
25  
26  
27  
28  
29  
30  
31  
32  
33  
34  
35  
36  
37  
38  
39  
40  
41  
42  
43  
44  
45  
46  
47

Confidential

**TABLE 2: Absolute differences in the proportions of women gaining below, within or above gestational weight gain recommendations, stratified by antenatal health care provider**

| Antenatal Health Care Provider | Absolute Difference (95% Confidence Interval) |                        |                        |
|--------------------------------|-----------------------------------------------|------------------------|------------------------|
|                                | GWG < Recommended                             | GWG = Recommended      | GWG > Recommended      |
| MW vs. OB                      | -3.0% (-3.4% to -2.6%)                        | 0.6% (0.0% to 1.1%)    | 2.4% (1.8% to 3.0%)    |
| MW vs. FD                      | -2.1% (-2.7% to -1.6%)                        | 2.3% (1.6% to 3.1%)    | -0.2% (-1.0% to 0.6%)  |
| MW vs. FD+OB                   | -1.0% (-1.5% to -0.5%)                        | 3.7% (3.0% to 4.4%)    | -2.7% (-3.4% to -1.9%) |
| FD vs. OB                      | -0.9% (-1.3% to -0.4%)                        | -1.8% (-2.4% to -1.2%) | 2.6% (2.0% to 3.3%)    |
| FD vs. FD+OB                   | 1.1% (0.6% to 1.7%)                           | 1.4% (0.6% to 2.1%)    | -2.5% (-3.3% to -1.7%) |
| OB vs. FD+OB                   | 2.0% (1.6% to 2.4%)                           | 3.1% (2.6% to 3.6%)    | -5.1% (-5.7% to -4.5%) |

Abbreviations: MW, Midwife; FD, Family Doctor; OB, Obstetrician; GWG, Gestational Weight Gain

Confidential



FIGURE 1. Cohort selection by antenatal health care provider

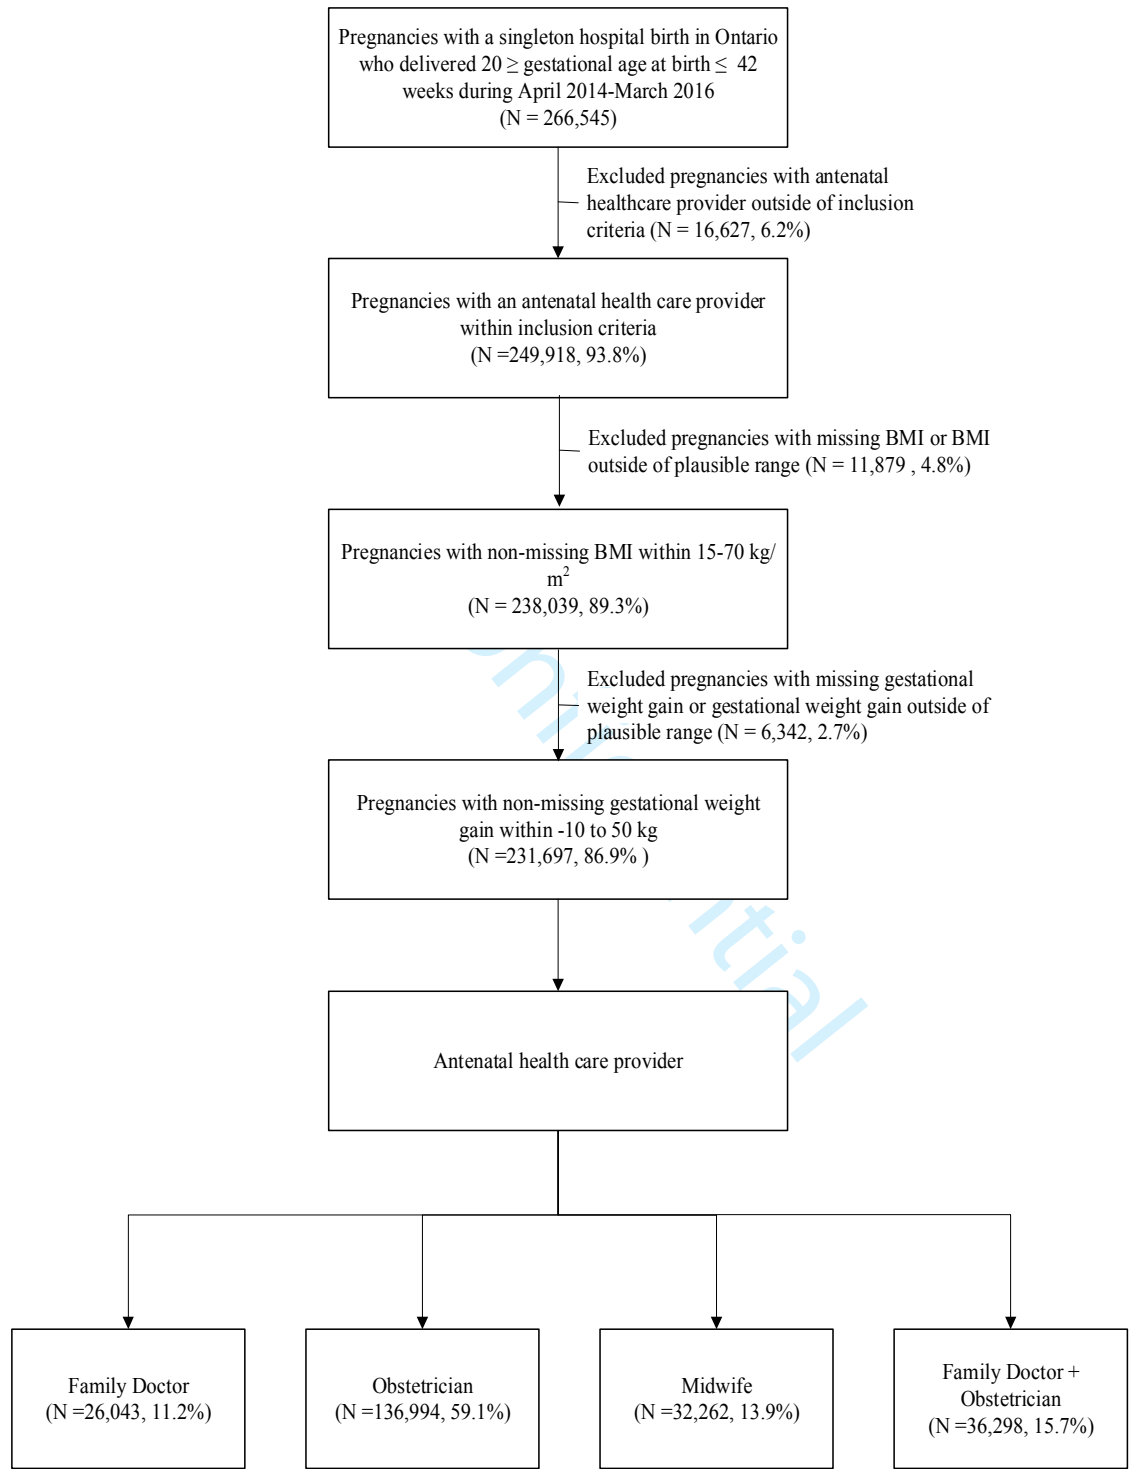

**FIGURE 2. Percentages of gestational weight gain below, within and above the guidelines stratified according to antenatal health care provider**

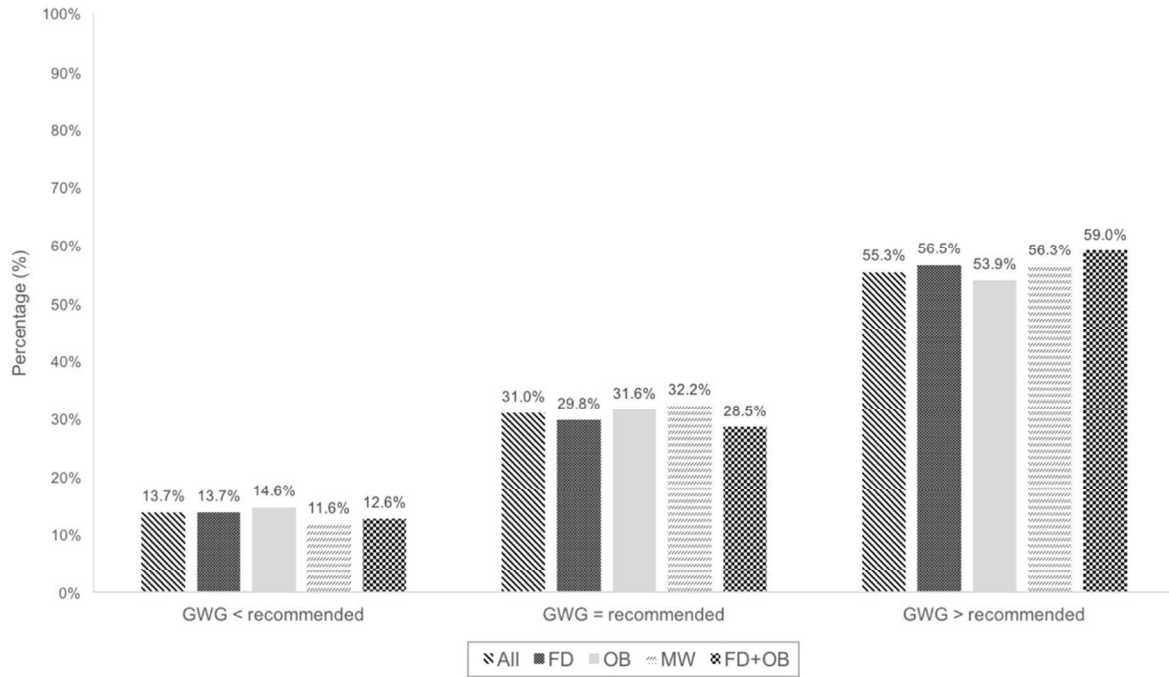

**FIGURE 3. Adjusted relative risk of SGA, LGA, PTB, cesarean among pregnancies with a GWG < recommended relative to those with GWG within the guidelines, stratified according to antenatal health care provider**

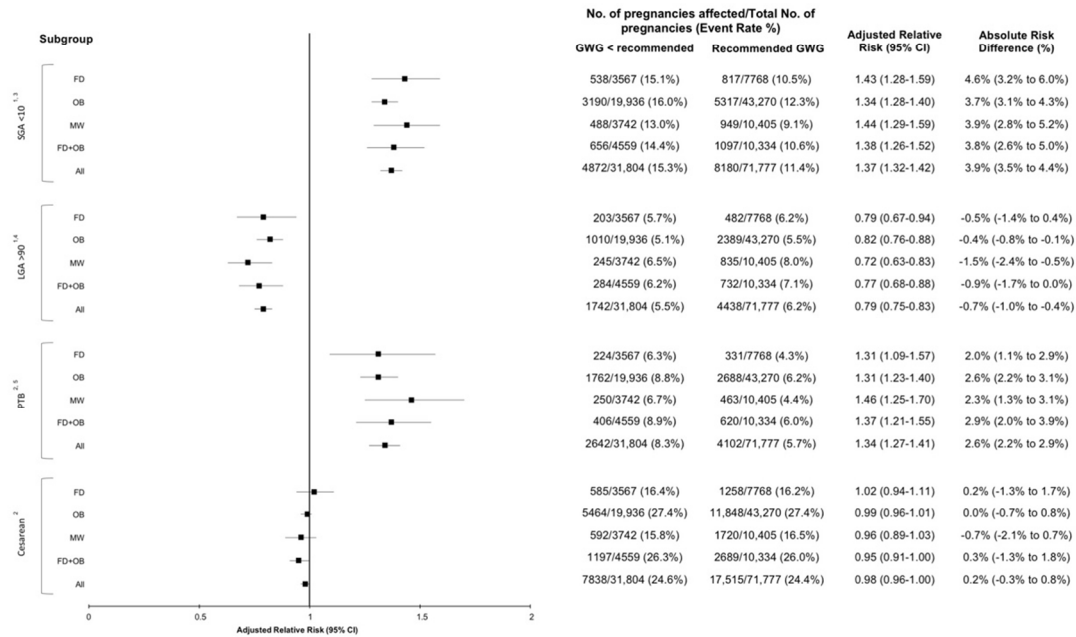

**Data Sources:** BORN Ontario (2014-2016)

**Abbreviations:** CI, confidence interval; FD, Family Doctor; OB, Obstetrician; MW, Midwife; HCP, Healthcare Provider; GWG, Gestational Weight Gain; PTB, preterm birth; SGA, Small for gestational age; LGA, Large for gestational age

**Notes:** <sup>1</sup>Adjusted for maternal age, parity, gestational age at birth, pre-pregnancy BMI, income quintile, education quintile, smoking, depression, pre-existing diabetes, pre-existing hypertension and gestational diabetes mellitus

<sup>2</sup>Adjusted for maternal age, parity, gestational age at birth, pre-pregnancy BMI, income quintile, education quintile, smoking, pre-existing diabetes, pre-existing hypertension, gestational diabetes mellitus, drug exposure, alcohol consumption, mental illness, previous: caesarean, term birth, preterm birth, vaginal birth, stillbirth, abortion; non-vertex presentation and male newborn

<sup>3</sup>SGA <10 defined as birth weight less than the 10th centile as per the Canadian reference population adjusted for gestational age; Kramer et al. (2001)

<sup>4</sup>LGA >90 defined as birth weight greater than the 90th centile as per the Canadian reference population adjusted for gestational age; Kramer et al. (2001)

<sup>5</sup>PTB defined as a live birth or stillbirth < 37 weeks (gestational age at birth)

**FIGURE 4. Adjusted relative risk of SGA, LGA, PTB, cesarean among pregnancies with a GWG > recommended relative to those with GWG within the guidelines, stratified according to antenatal health care provider**

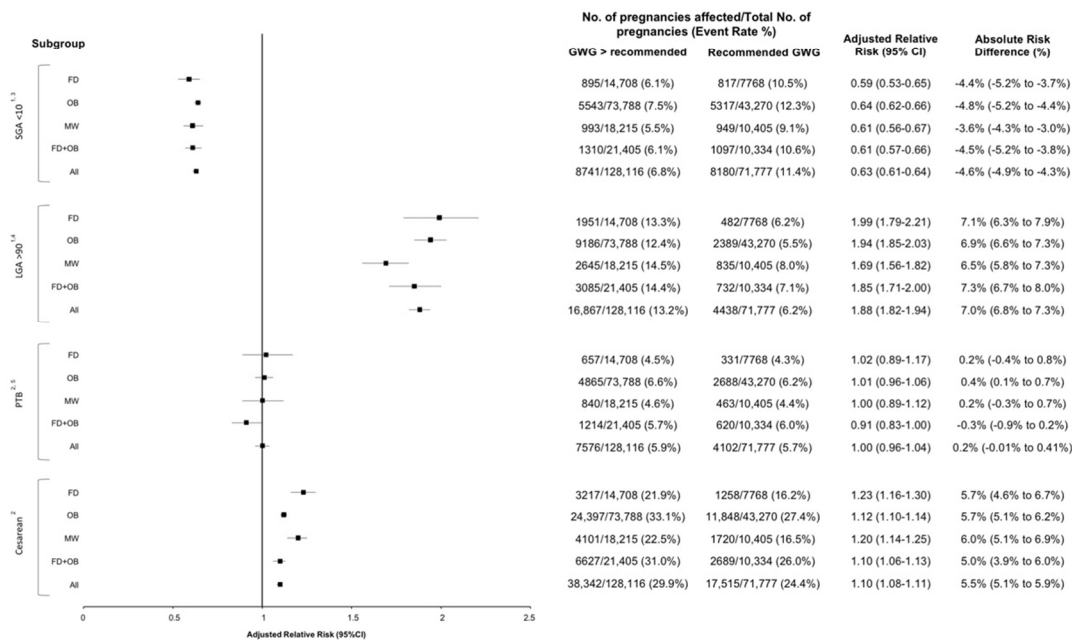

**Data Sources:** BORN Ontario (2014-2016)

**Abbreviations:** CI, confidence interval; FD, Family Doctor; OB, Obstetrician; MW, Midwife; HCP, Healthcare Provider; GWG, Gestational Weight Gain; PTB, preterm birth; SGA, Small for gestational age; LGA, Large for gestational age

**Notes:** <sup>1</sup>Adjusted for maternal age, parity, gestational age at birth, pre-pregnancy BMI, income quintile, education quintile, smoking, depression, pre-existing diabetes, pre-existing hypertension and gestational diabetes mellitus

<sup>2</sup>Adjusted for maternal age, parity, gestational age at birth, pre-pregnancy BMI, income quintile, education quintile, smoking, pre-existing diabetes, pre-existing hypertension, gestational diabetes mellitus, drug exposure, alcohol consumption, mental illness, previous: caesarean, term birth, preterm birth, vaginal birth, stillbirth, abortion; non-vertex presentation and male newborn

<sup>3</sup>SGA<10 defined as birth weight less than the 10th centile as per the Canadian reference population adjusted for gestational age; Kramer et al. (2001)

<sup>4</sup>LGA>90 defined as birth weight greater than the 90th centile as per the Canadian reference population adjusted for gestational age; Kramer et al. (2001)

<sup>5</sup>PTB defined as a live birth or stillbirth < 37 weeks (gestational age at birth)

**FIGURE 5. Population attributable fractions of SGA, LGA, PTB, and cesarean for GWG > recommended relative to those with GWG within the guidelines, stratified according to antenatal health care provider**

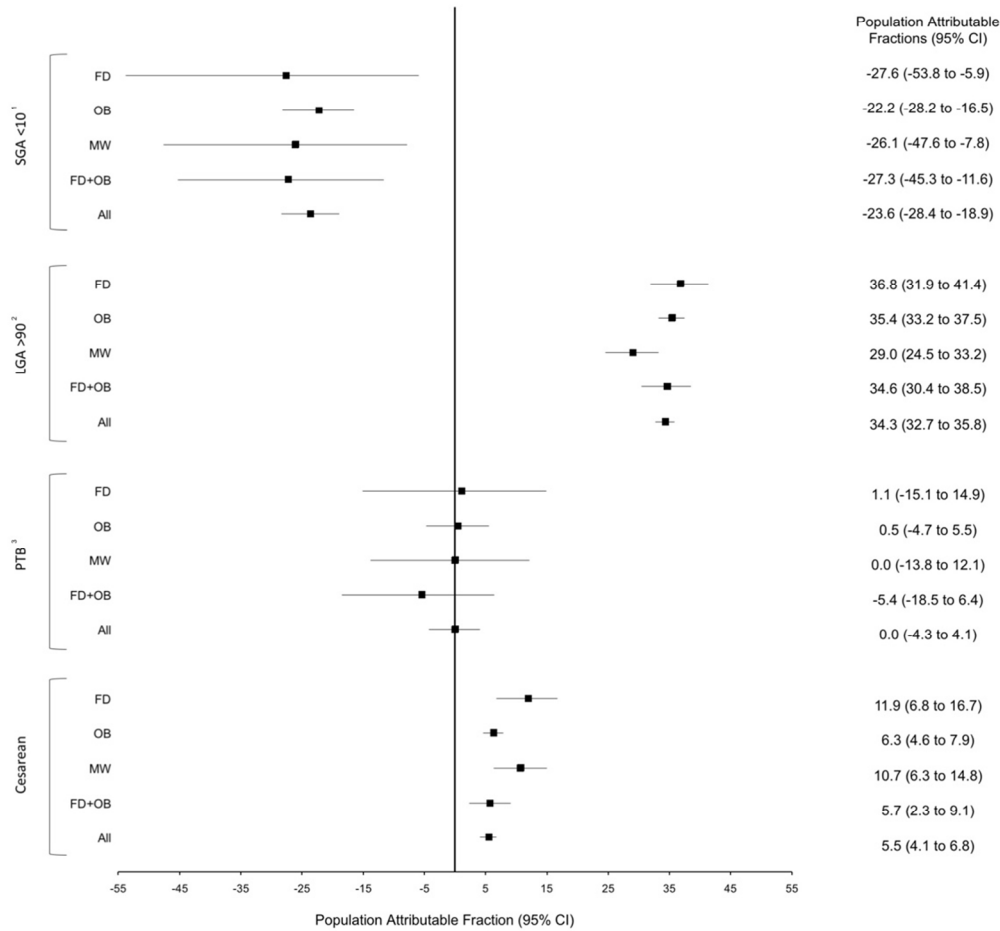

**Data Sources:** BORN Ontario (2014-2016)

**Abbreviations:** CI, confidence interval; FD, Family Doctor; OB, Obstetrician; MW, Midwife; HCP, Healthcare Provider; GWG, Gestational Weight Gain; PTB, preterm birth; SGA, Small for gestational age; LGA, Large for gestational age

**Notes:**

<sup>1</sup> SGA<10 defined as birth weight less than the 10th centile as per the Canadian reference population adjusted for gestational age; Kramer et al. (2001)

<sup>2</sup> LGA>90 defined as birth weight greater than the 90th centile as per the Canadian reference population adjusted for gestational age; Kramer et al. (2001)

<sup>3</sup> PTB defined as a live birth or stillbirth < 37 weeks (gestational age at birth)

**FIGURE 6. Population attributable fractions of SGA, LGA, PTB, and cesarean for GWG < recommended relative to those with GWG within the guidelines, stratified according to antenatal health care provider**

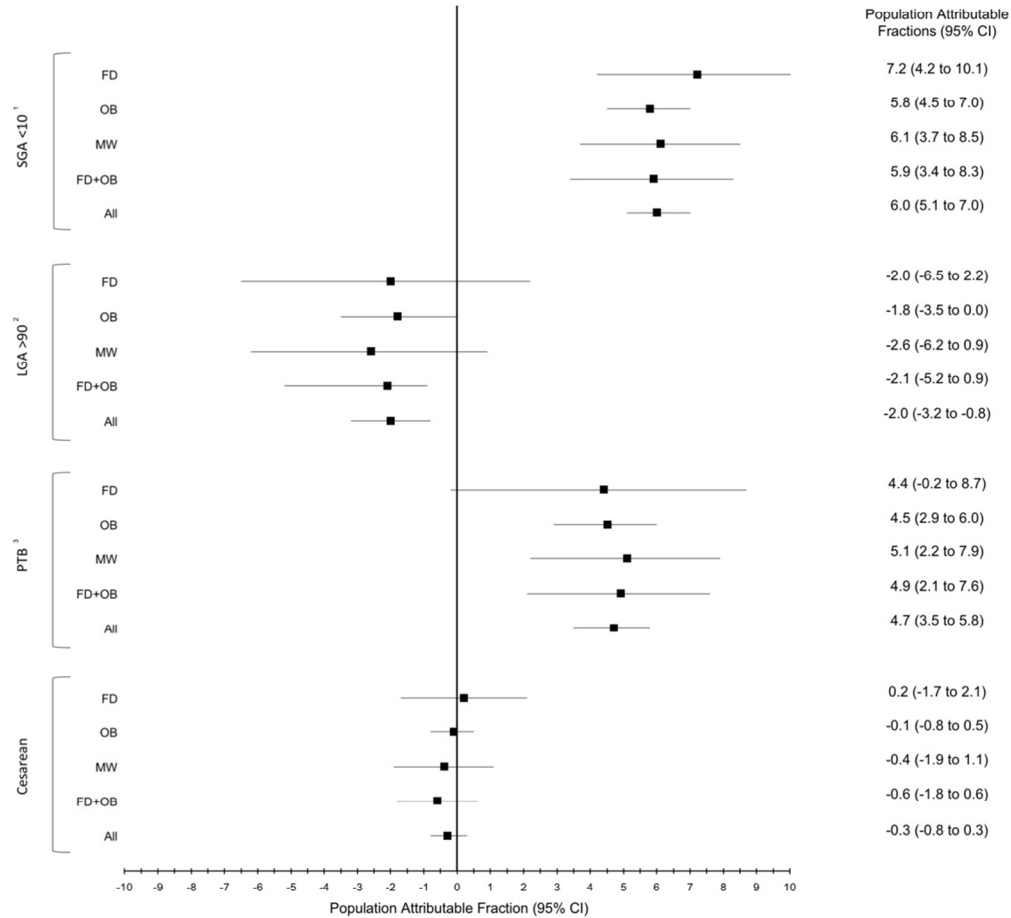

**Data Sources:** BORN Ontario (2014-2016)

**Abbreviations:** CI, confidence interval; FD, Family Doctor; OB, Obstetrician; MW, Midwife; HCP, Healthcare Provider; GWG, Gestational Weight Gain; PTB, preterm birth; SGA, Small for gestational age; LGA, Large for gestational age

**Notes:**

<sup>1</sup> SGA<math><10</math> defined as birth weight less than the 10th centile as per the Canadian reference population adjusted for gestational age; Kramer et al. (2001)

<sup>2</sup> LGA>math>>90</math> defined as birth weight greater than the 90th centile as per the Canadian reference population adjusted for gestational age; Kramer et al. (2001)

<sup>3</sup> PTB defined as a live birth or stillbirth <math>< 37</math> weeks (gestational age at birth)

**SUPPLEMENTARY TABLE 1: Multiple health care provider assignment algorithm**

The following algorithm was applied to assign antenatal HCP in cases where a woman had multiple HCPs.

|                                           |                                                                                                                                                                                                                                                                                                                                                                                                |
|-------------------------------------------|------------------------------------------------------------------------------------------------------------------------------------------------------------------------------------------------------------------------------------------------------------------------------------------------------------------------------------------------------------------------------------------------|
| Midwife + Obstetrician:                   | A woman would be assigned to the midwife group, with the assumption that she started her pregnancy with a midwife and was transferred to an obstetrician, where shared care was followed. The assumption will be the majority of antenatal care would be provided by the midwife.                                                                                                              |
| Family Physician + Obstetrician:          | It is not uncommon for women to see their family physician until 32 weeks and then have their care transferred to an obstetrician. An assumption cannot be applied reliably for this scenario and thus Family Physician + Obstetrician will comprise a category in itself.                                                                                                                     |
| Family Physician + Midwife                | A woman would be assigned to the midwife group as this generally represents the scenario where a woman was seen by a family physician once and transferred to a midwife for the remainder of their care.                                                                                                                                                                                       |
| Family Physician + Midwife + Obstetrician | A woman would be assigned to the midwife group for this scenario. This generally represents a scenario where a woman was initially seen by a family physician and was subsequently transferred to a midwife and is then later transferred to an obstetrician. The midwife and the obstetrician will follow a shared care model, where the midwife will provide the majority of antenatal care. |



**SUPPLEMENTARY TABLE 2: Total gestational weight gain recommended for singleton pregnancies based on a woman's pre-pregnancy BMI (adapted from: IOM, 2009).**

| <b>Pre-pregnancy BMI (kg/m<sup>2</sup>)</b> | <b>Recommended Total GWG<br/>(kg)</b> | <b>Weekly Recommended gain<br/>in 2nd and 3rd Trimester<br/>(kg/week)</b> |
|---------------------------------------------|---------------------------------------|---------------------------------------------------------------------------|
| Underweight: BMI < 18.5                     | 12.5 - 18.0                           | 0.44-0.58                                                                 |
| Normal weight: 18.5 ≤ BMI < 25              | 11.5 - 16.0                           | 0.35-0.50                                                                 |
| Overweight: 25 ≤ BMI < 30                   | 7.0 - 11.5                            | 0.23-0.33                                                                 |
| Obese: BMI ≥ 30                             | 5.0 - 9.0                             | 0.17-0.27                                                                 |

Institute of Medicine, National Research Council Committee to Reexamine. The National Academies Collection: Reports funded by National Institutes of Health. In: Rasmussen KM, Yaktine AL, eds. Weight Gain During Pregnancy: Reexamining the Guidelines. Washington (DC): National Academies Press (US) National Academy of Sciences, 2009.

**SUPPLEMENTARY TABLE 3: Standardized differences of total gestational weight gain stratified by antenatal health care provider**

| Antenatal Health Care Provider | Standardized Difference<br>(95% Confidence Interval) |                        |                         |
|--------------------------------|------------------------------------------------------|------------------------|-------------------------|
|                                | GWG < Recommended                                    | GWG = Recommended      | GWG > Recommended       |
| MW vs. OB                      | -0.09 (-0.10 to -0.08)                               | 0.01 (0.00 to 0.02)    | 0.05 (0.04 to 0.06)     |
| MW vs. FD                      | -0.06 (-0.08 to -0.04)                               | 0.05 (0.03 to 0.07)    | 0.00 (-0.02 to 0.02)    |
| MW vs. FD+OB                   | -0.03 (-0.04 to -0.02)                               | 0.08 (0.07 to 0.09)    | -0.05 (-0.06 to -0.04)  |
| FD vs. OB                      | -0.02 (-0.03 to -0.01)                               | -0.04 (-0.05 to -0.03) | 0.05 (0.04 to 0.06)     |
| FD vs. FD+OB                   | 0.03 (0.01 to 0.05)                                  | 0.03 (0.01 to 0.05)    | -0.05 (-0.07 to -0.03)  |
| OB vs. FD+OB                   | 0.06 (0.05 to 0.07)                                  | 0.07 (0.06 to 0.08)    | -0.10 (-0.11 to -0.09)* |

\*A standardized difference greater than 0.10 indicates an important difference

Abbreviations: MW, Midwife; FD, Family Doctor; OB, Obstetrician; GWG, Gestational Weight Gain

Confidential

SUPPLEMENTARY TABLE 4: Rate (%) and adjusted relative risk of adverse maternal and neonatal outcomes with gestational weight gain

| Outcome               | Antenatal HCP | GWG < recommended (n, %) | GWG = recommended (n, %) | GWG > recommended (n, %) | GWG < recommended |                      | GWG > recommended |                      |
|-----------------------|---------------|--------------------------|--------------------------|--------------------------|-------------------|----------------------|-------------------|----------------------|
|                       |               |                          |                          |                          | Crude RR (95% CI) | Adjusted RR (95% CI) | Crude RR (95% CI) | Adjusted RR (95% CI) |
| SGA <10 <sup>1</sup>  | FD            | 538 (15.1%)              | 817 (10.5%)              | 895 (6.1%)               | 1.42 (1.29-1.58)  | 1.43 (1.28-1.59)     | 0.58 (0.53-0.63)  | 0.59 (0.53-0.65)     |
|                       | OB            | 3,190 (16%)              | 5,317 (12.3%)            | 5,543 (7.5%)             | 1.30 (1.25-1.36)  | 1.34 (1.28-1.4)      | 0.61 (0.59-0.63)  | 0.64 (0.62-0.66)     |
|                       | MW            | 488 (13%)                | 949 (9.1%)               | 993 (5.5%)               | 1.44 (1.3-1.59)   | 1.44 (1.29-1.59)     | 0.60 (0.55-0.65)  | 0.61 (0.56-0.67)     |
|                       | FD + OB       | 656 (14.4%)              | 1,097 (10.6%)            | 1,310 (6.1%)             | 1.35 (1.24-1.48)  | 1.38 (1.26-1.52)     | 0.58 (0.53-0.62)  | 0.61 (0.57-0.66)     |
|                       | All           | 4,872 (15.3%)            | 8,180 (11.4)             | 8,741 (6.8%)             | 1.34 (1.3-1.39)   | 1.37 (1.32-1.42)     | 0.60 (0.58-0.62)  | 0.63 (0.61-0.64)     |
| LGA >90 <sup>2</sup>  | FD            | 203 (5.7%)               | 482 (6.2%)               | 1,951 (13.3%)            | 0.92 (0.79-1.08)  | 0.79 (0.67-0.94)     | 2.13 (1.94-2.35)  | 1.99 (1.79-2.21)     |
|                       | OB            | 1,010 (5.1%)             | 2,389 (5.5%)             | 9,186 (12.4%)            | 0.92 (0.86-0.99)  | 0.82 (0.76-0.88)     | 2.25 (2.15-2.35)  | 1.94 (1.85-2.03)     |
|                       | MW            | 245 (6.5%)               | 835 (8%)                 | 2,645 (14.5%)            | 0.81 (0.71-0.93)  | 0.72 (0.63-0.83)     | 1.80 (1.67-1.94)  | 1.69 (1.56-1.82)     |
|                       | FD + OB       | 284 (6.2%)               | 732 (7.1%)               | 3,085 (14.4%)            | 0.88 (0.77-1.00)  | 0.77 (0.68-0.88)     | 2.03 (1.88-2.19)  | 1.85 (1.71-2.00)     |
|                       | All           | 1,742 (5.5%)             | 4,438 (6.2%)             | 16,867 (13.2%)           | 0.89 (0.84-0.94)  | 0.79 (0.75-0.83)     | 2.12 (2.05-2.19)  | 1.88 (1.82-1.94)     |
| PTB <sup>3</sup>      | FD            | 201 (5.6%)               | 314 (4%)                 | 625 (4.2%)               | 1.39 (1.17-1.65)  | 1.31 (1.09-1.57)     | 1.05 (0.92-1.2)   | 1.02 (0.88-1.17)     |
|                       | OB            | 1,666 (8.4%)             | 2,573 (5.9%)             | 4,714 (6.4%)             | 1.41 (1.32-1.49)  | 1.29 (1.22-1.38)     | 1.07 (1.03-1.13)  | 1.03 (0.98-1.08)     |
|                       | MW            | 235 (6.3%)               | 430 (4.1%)               | 805 (4.4%)               | 1.52 (1.3-1.77)   | 1.48 (1.26-1.73)     | 1.07 (0.95-1.2)   | 1.02 (0.91-1.15)     |
|                       | FD + OB       | 387 (8.5%)               | 596 (5.8%)               | 1,176 (5.5%)             | 1.46 (1.29-1.65)  | 1.37 (1.21-1.55)     | 0.95 (0.86-1.04)  | 0.91 (0.83-1.01)     |
|                       | All           | 2,489 (7.8%)             | 3,913 (5.5%)             | 7,320 (5.7%)             | 1.43 (1.37-1.51)  | 1.33 (1.26-1.4)      | 1.05 (1.01-1.09)  | 1.01 (0.97-1.05)     |
| Cesarean <sup>3</sup> | FD            | 585 (16.4%)              | 1,258 (16.2%)            | 3,217 (21.9%)            | 1.01 (0.92-1.1)   | 1.02 (0.94-1.11)     | 1.34 (1.27-1.42)  | 1.23 (1.16-1.30)     |
|                       | OB            | 5,464 (27.4%)            | 11,848 (27.4%)           | 24,397 (33.1%)           | 1.00 (0.97-1.03)  | 0.99 (0.96-1.01)     | 1.20 (1.18-1.22)  | 1.12 (1.1-1.14)      |
|                       | MW            | 592 (15.8%)              | 1,720 (16.5%)            | 4,101 (22.5%)            | 0.96 (0.88-1.04)  | 0.96 (0.89-1.03)     | 1.36 (1.29-1.43)  | 1.20 (1.14-1.25)     |
|                       | FD + OB       | 1,197 (26.3%)            | 2,689 (26%)              | 6,627 (31%)              | 1.00 (0.95-1.06)  | 0.95 (0.91-1.00)     | 1.18 (1.14-1.23)  | 1.10 (1.06-1.13)     |
|                       | All           | 7,838 (24.6%)            | 17,515 (24.4%)           | 38,342 (29.9%)           | 1.01 (0.99-1.03)  | 0.98 (0.96-1.00)     | 1.21 (1.2-1.23)   | 1.10 (1.08-1.11)     |

**Data Sources:** BORN Ontario (2014-2016)

**Abbreviations:** FD, Family Doctor; OB, Obstetrician; MW, Midwife; HCP, Healthcare Provider; GWG, Gestational Weight Gain; RR, Relative Risk; PTB, preterm birth; SGA, Small for gestational age; LGA, Large for gestational age

**Notes:** <sup>1</sup>Adjusted for maternal age, parity, gestational age at birth, pre-pregnancy BMI, income quintile, education quintile, smoking, depression, pre-existing diabetes, pre-existing hypertension

<sup>2</sup>Adjusted for maternal age, parity, gestational age at birth, pre-pregnancy BMI, income quintile, education quintile, smoking, depression, pre-existing diabetes, pre-existing hypertension, gestational diabetes mellitus

<sup>3</sup>Adjusted for maternal age, parity, gestational age at birth, pre-pregnancy BMI, income quintile, education quintile, smoking, pre-existing diabetes, pre-existing hypertension, gestational diabetes mellitus, drug exposure, alcohol consumption, mental illness, previous: caesarean, term birth, preterm birth, vaginal birth, stillbirth, abortion; non-vertex presentation, male newborn

<sup>4</sup>SGA<10 defined as birth weight less than the 10th centile as per the Canadian reference population adjusted for gestational age and sex;

1  
2  
3  
4  
5  
6  
7  
8  
9  
10  
11  
12  
13  
14  
15  
16  
17  
18  
19  
20  
21  
22  
23  
24  
25  
26  
27  
28  
29  
30  
31  
32  
33  
34  
35  
36  
37  
38  
39  
40  
41  
42  
43  
44  
45  
46  
47

Kramer et al. (2001)

<sup>5</sup> LGA>90 defined as birth weight greater than the 90th centile as per the Canadian reference population adjusted for gestational age and sex; Kramer et al. (2001)

<sup>6</sup> PTB defined as a live birth or stillbirth < 37 weeks (gestational age at birth)

Confidential
